# Supplementary material
Source: PubMed Central journal article supplement (PMC8062308)
Supplement: NIHMS1681596-supplement-Legacy_Supplemental_File.pdf [file NIHMS1681596-supplement-Legacy_Supplemental_File.pdf]

## SUPPLEMENTAL MATERIALS

### **Impaired Peripheral Microvascular Function and Risk of Major Adverse Cardiovascular Events in Patients with Coronary Artery Disease**

An Young<sup>1,2</sup>, Mariana Garcia<sup>1,2</sup>, Samaah M. Sullivan<sup>1</sup>, Chang Liu<sup>1</sup>, Kasra Moazzami<sup>1,2</sup>, Yi-An Ko<sup>3</sup>, Amit Shah,<sup>1,2,5</sup> Jeong Hwan Kim,<sup>2</sup> Brad Pearce<sup>1</sup>, Irina Uphoff<sup>1</sup>, J. Douglas Bremner,<sup>4,5</sup> Paolo Raggi,<sup>6</sup> Arshed Quyyumi<sup>2</sup> and Viola Vaccarino<sup>1,2</sup>

<sup>1</sup>Department of Epidemiology, Rollins School of Public Health, Emory University, Atlanta, GA

<sup>2</sup>Emory Clinical Cardiovascular Research Institute, Division of Cardiology, Emory University School of Medicine, Atlanta, GA

<sup>3</sup>Biostatistics and Bioinformatics, Rollins School of Public Health, Emory University, Atlanta, GA

<sup>4</sup>Psychiatry and Behavioral Sciences, Emory University School of Medicine, Atlanta, GA

<sup>5</sup>Atlanta VA Medical Center

<sup>6</sup>Mazankowski Alberta Heart Institute, University of Alberta, Canada

## Major Resources Table

In order to allow validation and replication of experiments, all essential research materials listed in the Methods should be included in the Major Resources Table below. Authors are encouraged to use public repositories for protocols, data, code, and other materials and provide persistent identifiers and/or links to repositories when available. Authors may add or delete rows as needed.

### Animals (in vivo studies): NA

| Species | Vendor or Source | Background Strain | Sex | Persistent ID / URL |
|---------|------------------|-------------------|-----|---------------------|
|         |                  |                   |     |                     |
|         |                  |                   |     |                     |
|         |                  |                   |     |                     |

### Genetically Modified Animals: NA

|                 | Species | Vendor or Source | Background Strain | Other Information | Persistent ID / URL |
|-----------------|---------|------------------|-------------------|-------------------|---------------------|
| Parent - Male   |         |                  |                   |                   |                     |
| Parent - Female |         |                  |                   |                   |                     |

### Antibodies: NA

| Target antigen | Vendor or Source | Catalog # | Working concentration | Lot # (preferred but not required) | Persistent ID / URL |
|----------------|------------------|-----------|-----------------------|------------------------------------|---------------------|
|                |                  |           |                       |                                    |                     |
|                |                  |           |                       |                                    |                     |

### DNA/cDNA Clones: NA

| Clone Name | Sequence | Source / Repository | Persistent ID / URL |
|------------|----------|---------------------|---------------------|
|            |          |                     |                     |
|            |          |                     |                     |
|            |          |                     |                     |

### Cultured Cells: NA

| Name | Vendor or Source | Sex (F, M, or unknown) | Persistent ID / URL |
|------|------------------|------------------------|---------------------|
|      |                  |                        |                     |
|      |                  |                        |                     |
|      |                  |                        |                     |

### Data & Code Availability: NA

| Description | Source / Repository | Persistent ID / URL |
|-------------|---------------------|---------------------|
|             |                     |                     |
|             |                     |                     |
|             |                     |                     |

### Other

| Description | Source / Repository | Persistent ID / URL |
|-------------|---------------------|---------------------|
|             |                     |                     |
|             |                     |                     |
|             |                     |                     |
